# Supplementary material
Source: ML conference proceedings conference paper supplement (https://proceedings.neurips.cc/paper_files/paper/2016/hash/a869ccbcbd9568808b8497e28275c7c8-Abstract.html)
Supplement: Supplementary file [file a869ccbcbd9568808b8497e28275c7c8-Supplemental.zip]

---

# Supplementary Material for Adaptive Smoothed Online Multi-Task Learning

---

**Keerthiram Murugesan\***  
Carnegie Mellon University  
kmuruges@cs.cmu.edu

**Hanxiao Liu\***  
Carnegie Mellon University  
hanxiaol@cs.cmu.edu

**Jaime Carbonell**  
Carnegie Mellon University  
jgc@cs.cmu.edu

**Yiming Yang**  
Carnegie Mellon University  
yiming@cs.cmu.edu

## Theoretical Proofs

### Proof of Theorem 1

*Proof.* Define  $\Delta_k^{(t)} \stackrel{def}{=} \|w_k^{(t)} - w_k^*\|^2 - \|w_k^{(t+1)} - w_k^*\|^2$ .

We can first upper bound  $\sum_{t \in T} \Delta_k^{(t)}$  via  $\sum_{t \in [T]} \Delta_k^{(t)} = \sum_{t \in [T]} \|w_k^{(t)} - w_k^*\|^2 - \|w_k^{(t+1)} - w_k^*\|^2 = \|w_k^{(0)} - w_k^*\|^2 - \|w_k^{(T+1)} - w_k^*\|^2 \leq \|w_k^*\|^2$ .

We further notice any non-zero  $\Delta_k^{(t)}$  can be lower-bounded via

$$\Delta_k^{(t)} = \|w_k^{(t)} - w_k^*\|^2 - \|w_k^{(t)} - C \sum_{j \in [K]^+} \eta_{kj}^{(t)} \ell_{kj}^{(t)'} - w_k^*\|^2 \quad (1)$$

$$= 2C w_k^{(t)} \sum_{j \in [K]^+} \eta_{kj}^{(t)} \ell_{kj}^{(t)'} - 2C w_k^* \sum_{j \in [K]^+} \eta_{kj}^{(t)} \ell_{kj}^{(t)'} - C^2 \left\| \sum_{j \in [K]^+} \eta_{kj}^{(t)} \ell_{kj}^{(t)'} \right\|_2^2 \quad (2)$$

$$\geq 2C \sum_{j \in [K]^+} \eta_{kj}^{(t)} (\ell_{kj}^{(t)} - 1) - 2C \sum_{j \in [K]^+} \eta_{kj}^{(t)} (\ell_{kj}^{(t)*} - 1) - C^2 \left\| \sum_{j \in [K]^+} \eta_{kj}^{(t)} y_j^{(t)} x_j^{(t)} \right\|_2^2 \quad (3)$$

$$= 2C \sum_{j \in [K]^+} \eta_{kj}^{(t)} \ell_{kj}^{(t)} - 2C \sum_{j \in [K]^+} \eta_{kj}^{(t)} \ell_{kj}^{(t)*} - C^2 \left\| \sum_{j \in [K]^+} \eta_{kj}^{(t)} y_j^{(t)} x_j^{(t)} \right\|_2^2 \quad (4)$$

$$\geq 2C \eta_{kk}^{(t)} \ell_{kk}^{(t)} - 2C \sum_{j \in [K]^+} \eta_{kj}^{(t)} \ell_{kj}^{(t)*} - C^2 \left( \sum_{j \in [K]^+} \eta_{kj}^{(t)} \|x_j^{(t)}\|_2 \right)^2 \quad (5)$$

$$\geq 2C \eta_{kk}^{(t)} (\ell_{kk}^{(t)} - \ell_{kk}^{(t)*}) - 2C \sum_{j \in [K]^+, j \neq k} \eta_{kj}^{(t)} \ell_{kj}^{(t)*} - C^2 R^2 \quad (6)$$

$$\geq 2C \alpha (\ell_{kk}^{(t)} - \ell_{kk}^{(t)*}) - 2C(1 - \alpha) \ell_{kk}^{(t)*} - 2C \sum_{j \in [K]^+, j \neq k} \eta_{kj}^{(t)} \ell_{kj}^{(t)*} - C^2 R^2 \quad (7)$$

$$= 2C \alpha (\ell_{kk}^{(t)} - \ell_{kk}^{(t)*}) - 2C(1 - \alpha) \left( \ell_{kk}^{(t)*} + \sum_{j \in [K]^+, j \neq k} \eta_{kj}^{(t)} \ell_{kj}^{(t)*} \right) - C^2 R^2 \quad (8)$$

$$\geq 2C \alpha (\ell_{kk}^{(t)} - \ell_{kk}^{(t)*}) - 2C(1 - \alpha) \left( \ell_{kk}^{(t)*} + \max_{j \in [K]^+, j \neq k} \ell_{kj}^{(t)*} \right) - C^2 R^2 \quad (9)$$

---

\*Both student authors contributed equally.

Combining the aforementioned upper and lower bound over  $\sum_{t \in [T]} \Delta_k^{(t)}$ , we have

$$\sum_{t \in [T]} (\ell_{kk}^{(t)} - \ell_{kk}^{(t)*}) \leq \frac{1}{2C\alpha} \|w_k^*\|^2 + \frac{(1-\alpha)T}{\alpha} \left( \ell_{kk}^{(t)*} + \max_{j \in [K]^+, j \neq k} \ell_{kj}^{(t)*} \right) + \frac{CR^2T}{2\alpha} \quad (10)$$

□

### Proof of Corollary 2

*Proof.* By setting  $\alpha = \frac{\sqrt{T}}{1+\sqrt{T}}$  and  $C = \frac{1+\sqrt{T}}{T}$ , we have

$$\sum_{t \in [T]} (\ell_{kk}^{(t)} - \ell_{kk}^{(t)*}) \leq \frac{\sqrt{T}}{2} \|w_k^*\|^2 + \sqrt{T} \left( \ell_{kk}^{(t)*} + \max_{j \in [K]^+, j \neq k} \ell_{kj}^{(t)*} \right) + \frac{(1+\sqrt{T})^2}{2\sqrt{T}} R^2 \quad (11)$$

$$\leq \frac{\sqrt{T}}{2} \|w_k^*\|^2 + \sqrt{T} \left( \ell_{kk}^{(t)*} + \max_{j \in [K]^+, j \neq k} \ell_{kj}^{(t)*} \right) + 2\sqrt{T} R^2 \quad (12)$$

$$= \sqrt{T} \left( \frac{1}{2} \|w_k^*\|^2 + \ell_{kk}^{(t)*} + \max_{j \in [K]^+, j \neq k} \ell_{kj}^{(t)*} + 2R^2 \right) \quad (13)$$

Asymptotically, the average regret of our algorithm w.r.t the best predictor  $w^*$  in hindsight goes to 0. Since our algorithm depends on  $C$  and  $\alpha$ , our algorithm needs to know the value of  $T$ . We can get rid of the dependence of our regret bound on  $T$  using the *doubling trick*. □

### Relationship to Domain Adaptation and Life-long Learning

Multi-task learning has been studied in part under a related research topic, *Domain Adaptation* (DA) [1] under different assumptions. There are several key differences between those methods and ours: i) While DA tries to find a *single* hypothesis that works well for both the source and the target data, this paper finds a hypothesis for each task by adaptively leveraging related tasks. ii) It is a typical assumption in DA that the source domains are label-rich and the target domains are label-scarce. However, we are more interested in the scenario where there is a large number of tasks with very few examples available for each task. iii) DA uses predefined uniform weights or weights induced from VC-convergence theory during training, while our method allows cross-task weights to dynamically evolve in an adaptive manner.

The proposed online method is significantly different from lifelong learning (*ELLA* [2]). Unlike our online learning setting where the data from each task arrives in an online fashion, in lifelong learning, task arrives sequentially. At any time-step, the online learner either receives a subset of data for previously solved task or a completely new task.

### References

- [1] Shai Ben-David, John Blitzer, Koby Crammer, Alex Kulesza, Fernando Pereira, and Jennifer Wortman Vaughan. A theory of learning from different domains. *Machine learning*, 79(1-2):151–175, 2010.
- [2] Paul Ruvolo and Eric Eaton. Ella: An efficient lifelong learning algorithm. *International Conference on Machine Learning*, 28:507–515, 2013.
